# Supplementary material for: Effects of Exercise Combined with Undenatured Type II Collagen on Endurance Capacity, Antioxidant Status, Muscle Lipogenic Genes and E3 Ubiquitin Ligases in Rats
Source: PubMed Central journal article supplement (PMC8002679; doi:10.3390/ani11030851), 2021-03-17
Supplement: animals-11-00851-s001.pdf [file animals-11-00851-s001.pdf]

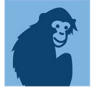

(A)

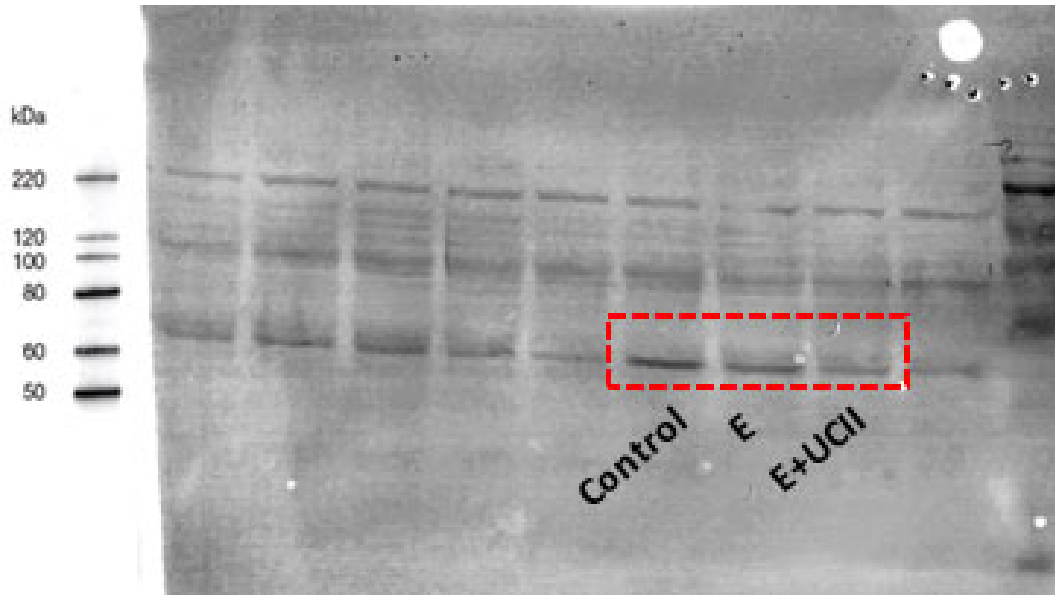

(B)

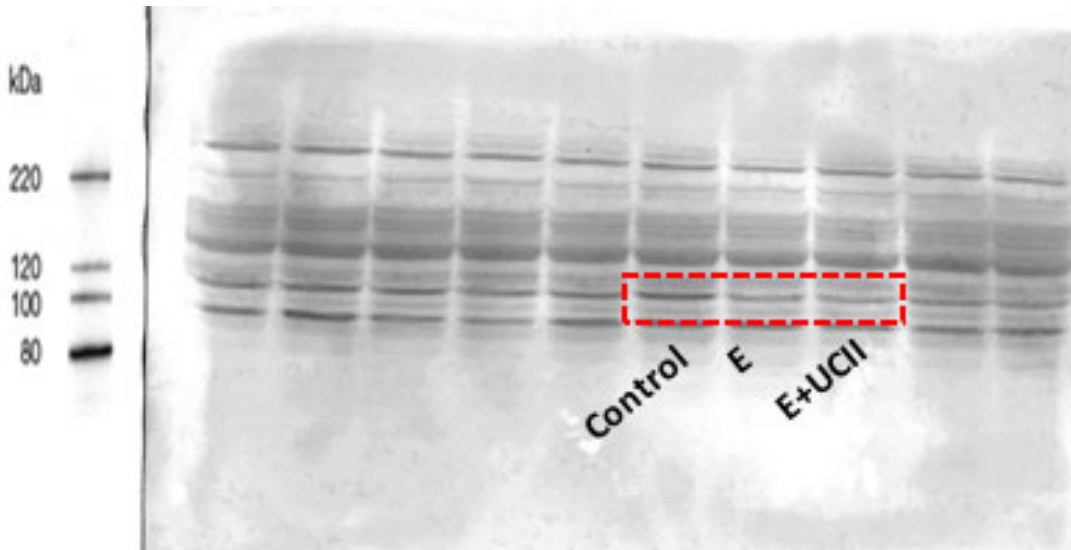

(C)

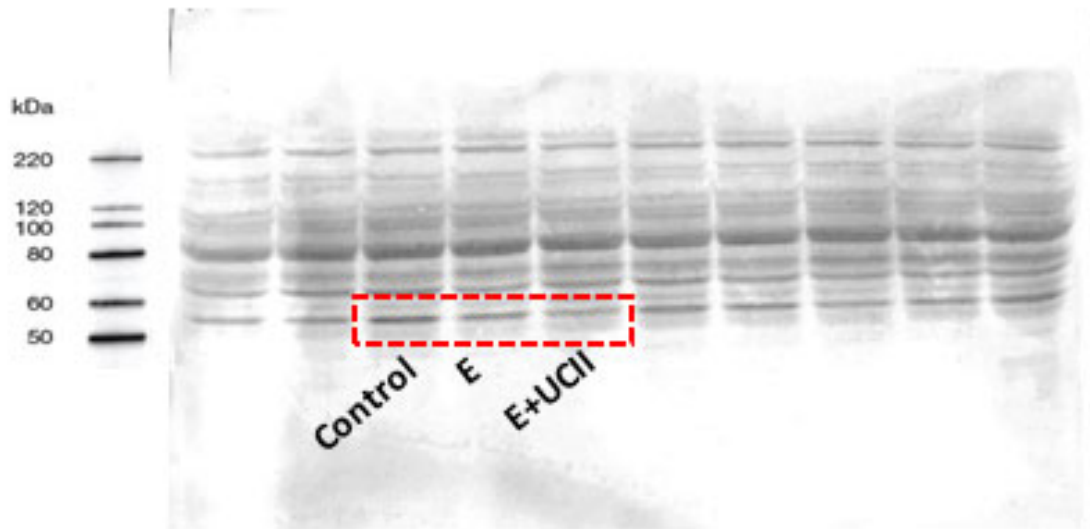

(D)

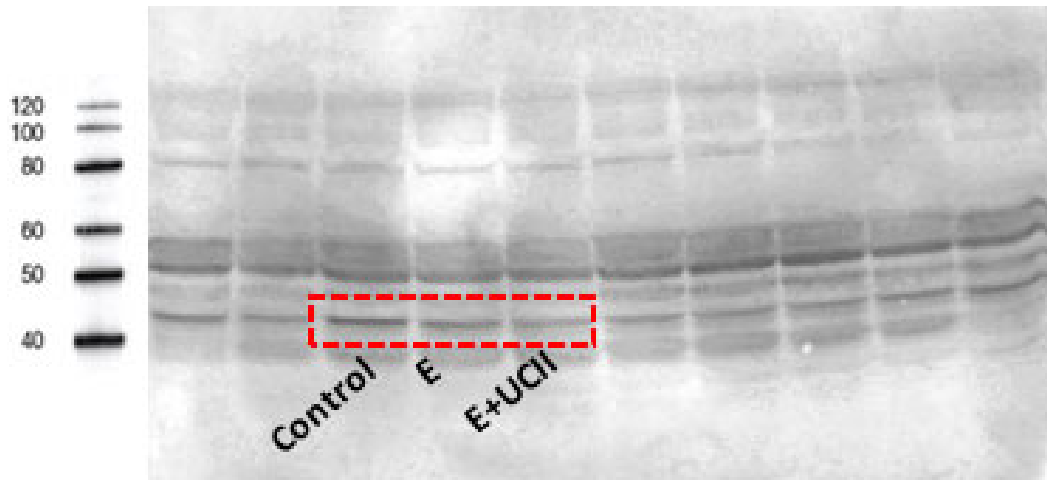

(E)

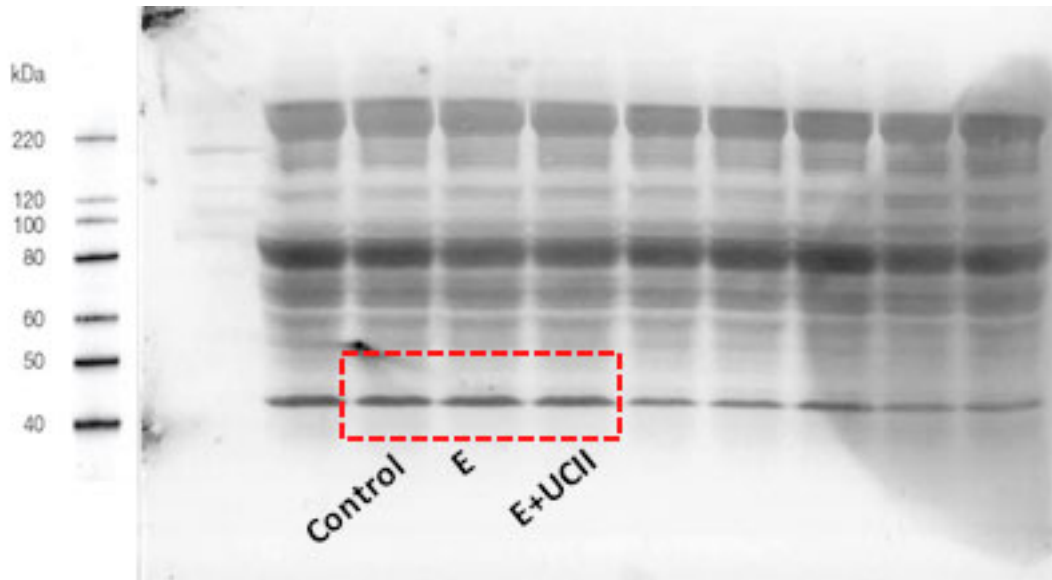

**Figure S1.** Full immunoblots related to Figure 4 (SREB-1C (A), ACLY (B), LXRs (C), FAS (D);  $\beta$ -Actin (E)). Each immunoblot is a representative of three independent experiments. Results shown in Figure4 are delineated by red dotted rectangles. MW (in kDa) are indicated. Control: no exercise and no UCII, E: exercised rats, Exercise + UCII, exercised rats receiving 4 mg/kg BW/day UCII.

(A)

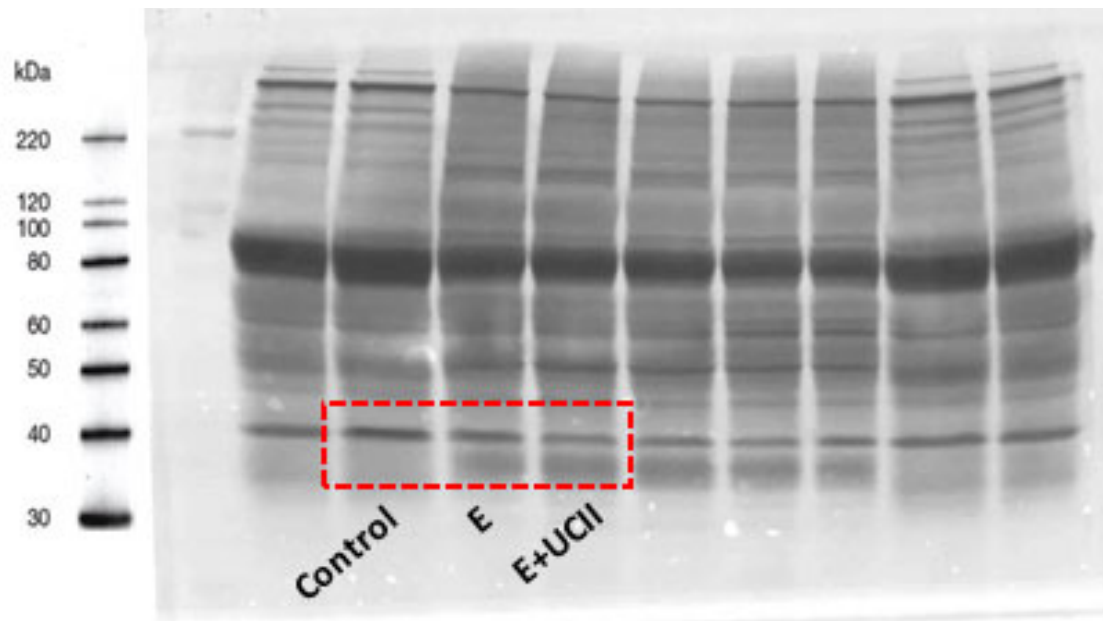

(B)

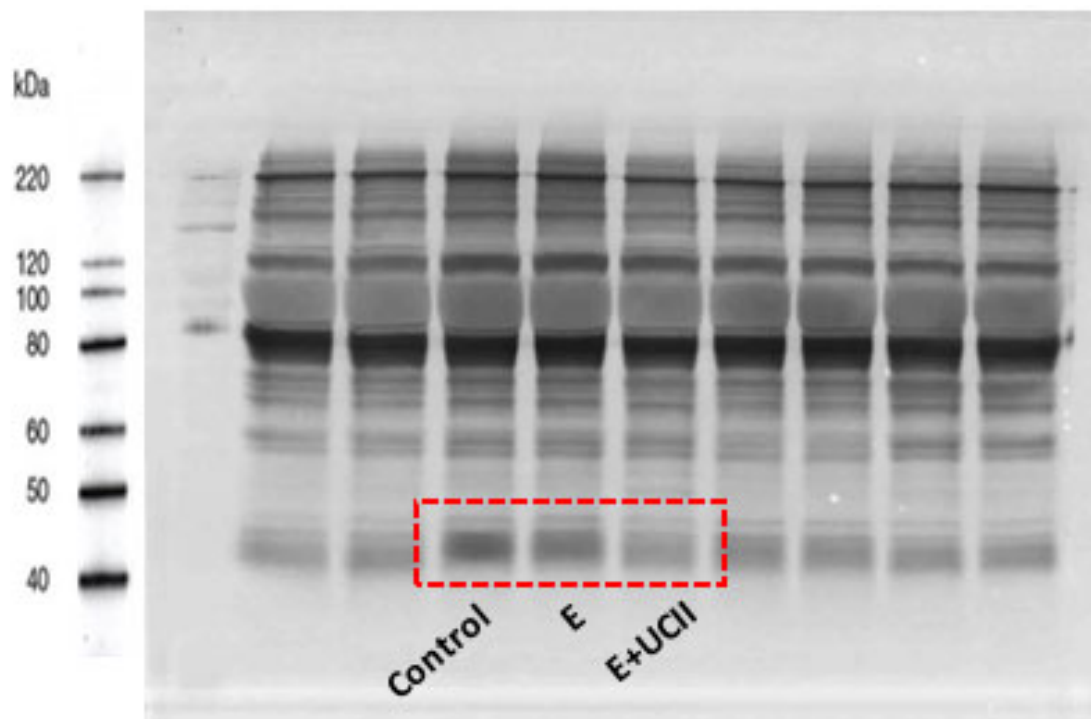

(C)

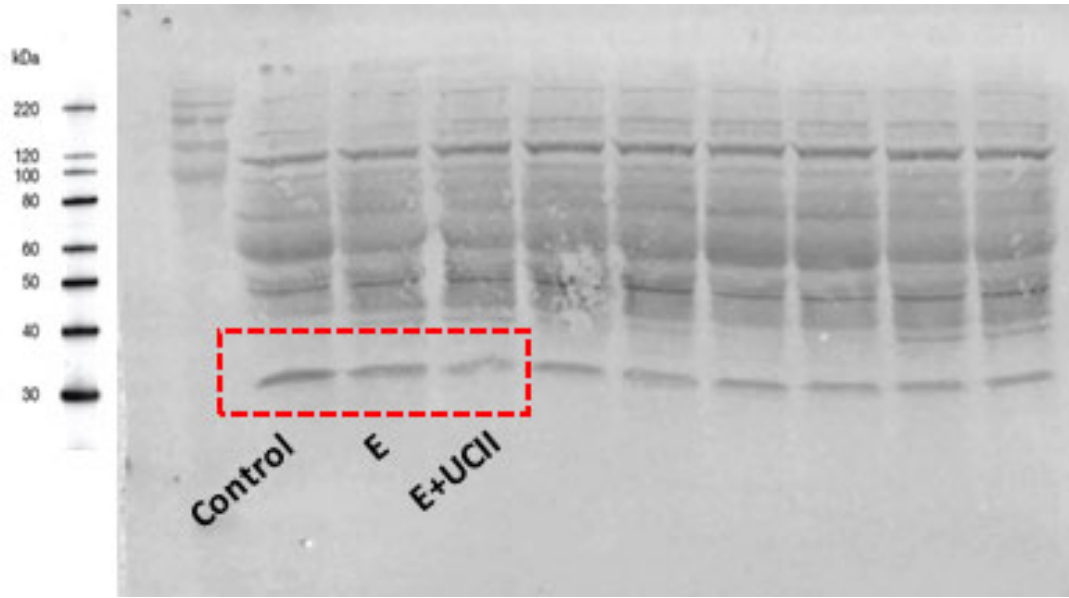

(D)

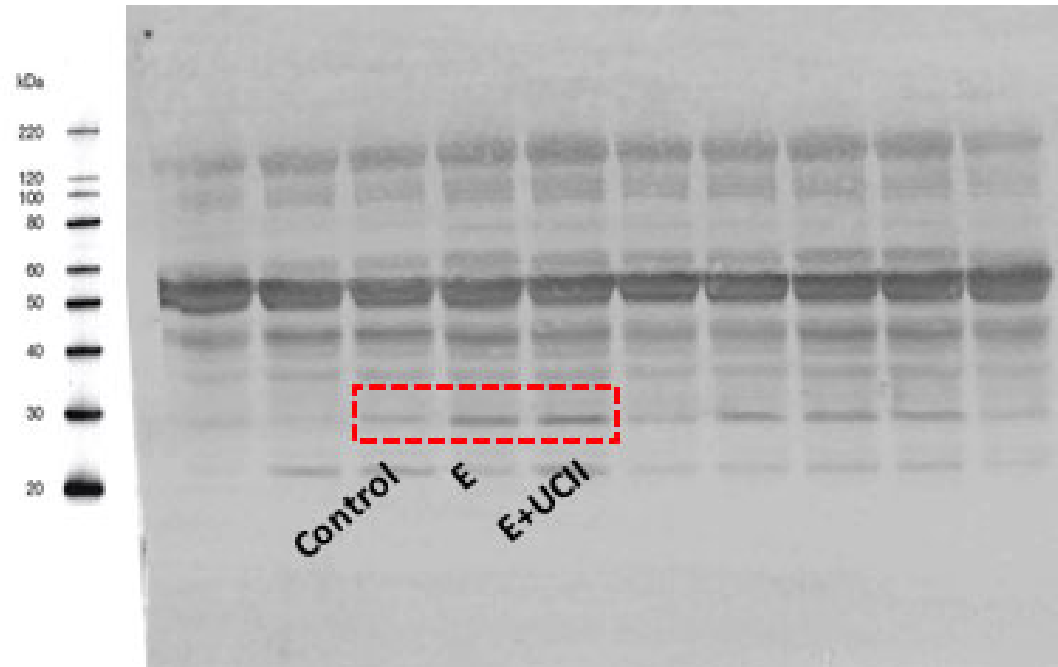

(E)

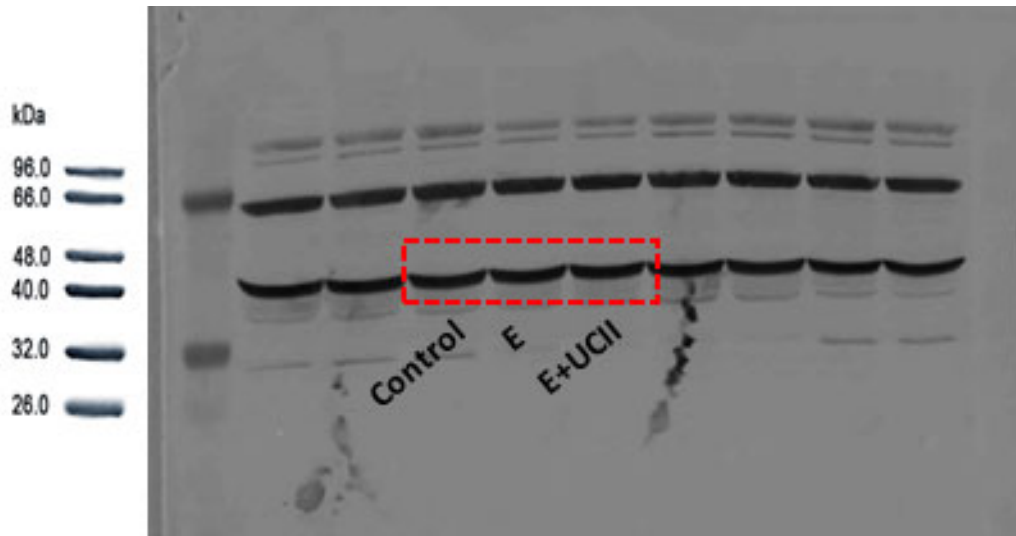

**Figure S2.** Full immunoblots related to Figure 5 (MAFbx (A), MuRF-1 (B), Myostatin (C), Myo D (D), and  $\beta$ -Actin (E)). Each immunoblot is a representative of three independent experiments. Results shown in Figure 5 are delineated by rectangles. MW (in kDa) are indicated. Control: no exercise and no UCII, E: exercised rats, Exercise + UCII, exercised rats receiving 4 mg/kg BW/day UCII.

(A)

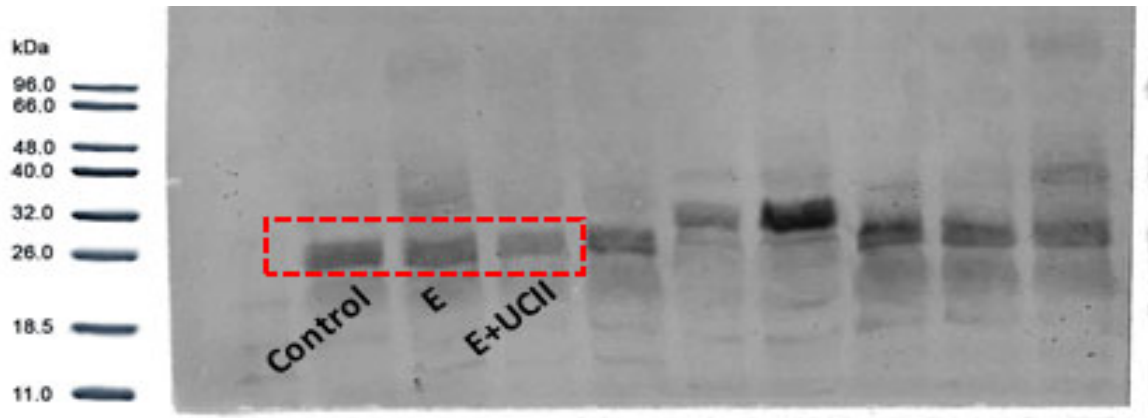

(B)

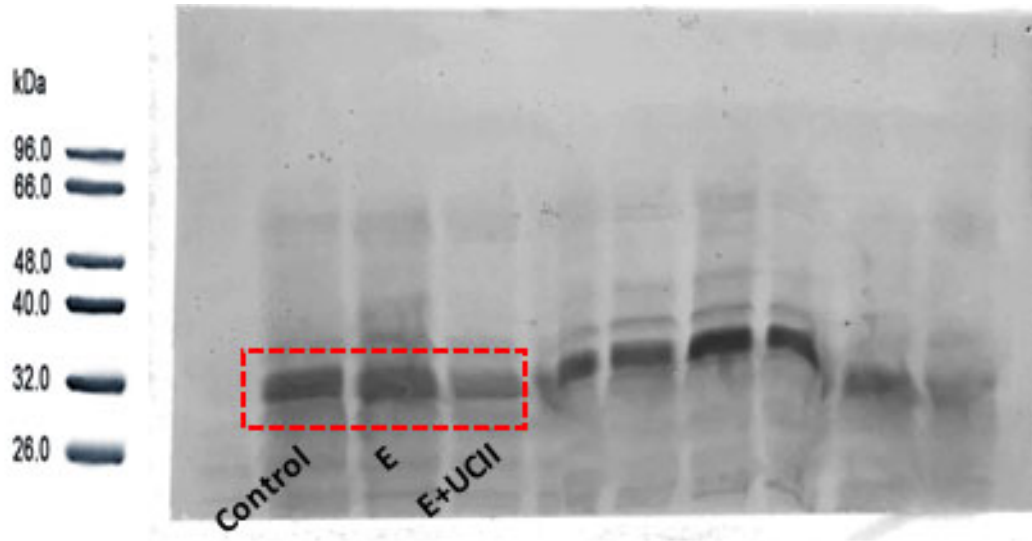

(C)

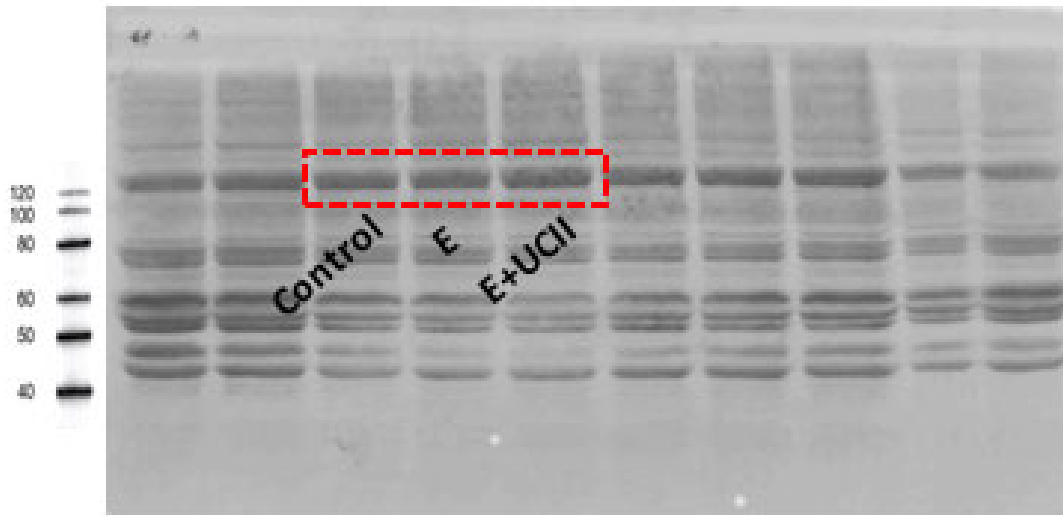

(D)

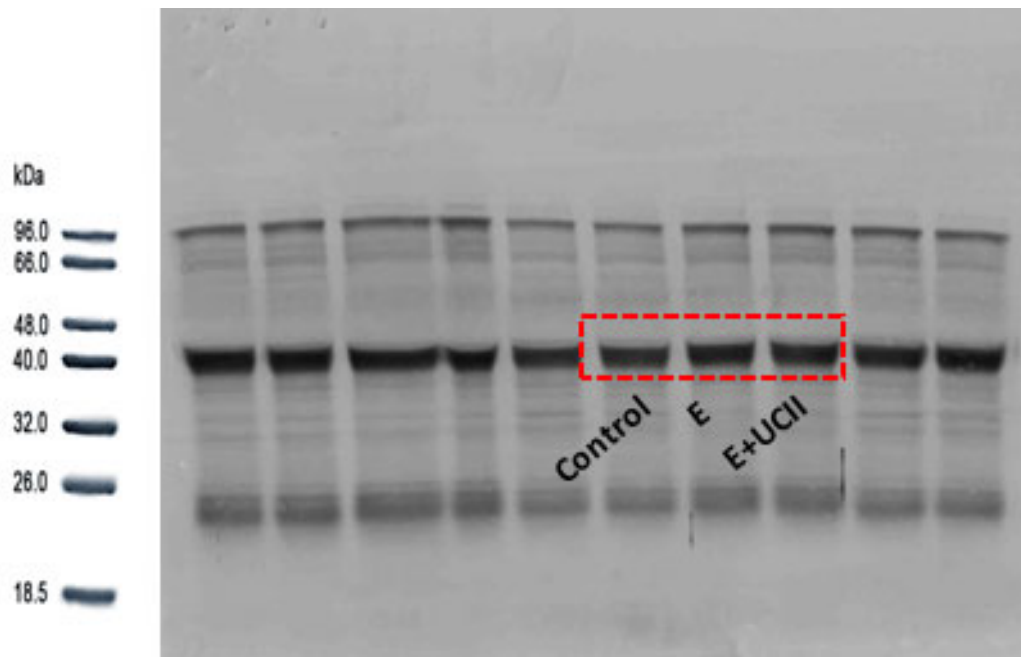

**Figure S3.** Full immunoblots related to Figure 6 (TNF- $\alpha$  (A), IL1- $\beta$  (B), NCAM (C) and  $\beta$ -Actin (D)). Each immunoblot is a representative of three independent experiments. Results shown in Figure 6 are delineated by rectangles. MW (in kDa) are indicated. Control: no exercise and no UCII, E: exercised rats, Exercise + UCII, exercised rats receiving 4 mg/kg BW/day UCII.
